# Supplementary material
Source: Springer Nature journal article supplement (https://www.springermedizin.de/resource/supplementary/12990_2009_230_MOESM3_ESM.pdf/9612840)

After 2-hour 35  $\mu\text{M}$  wortmannin incubation

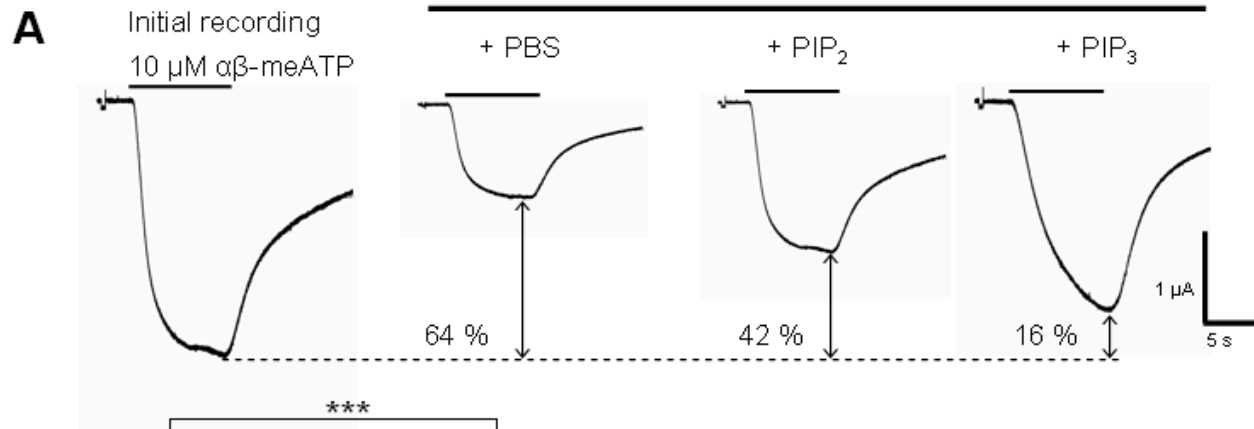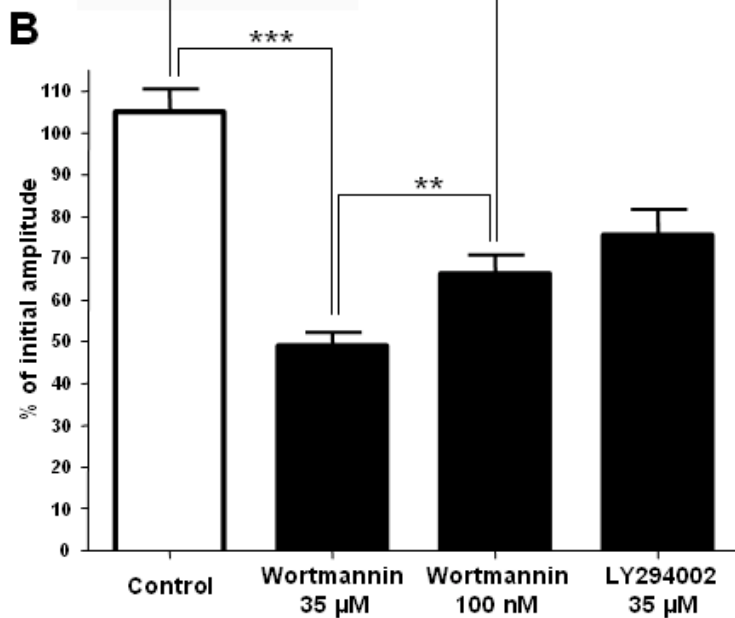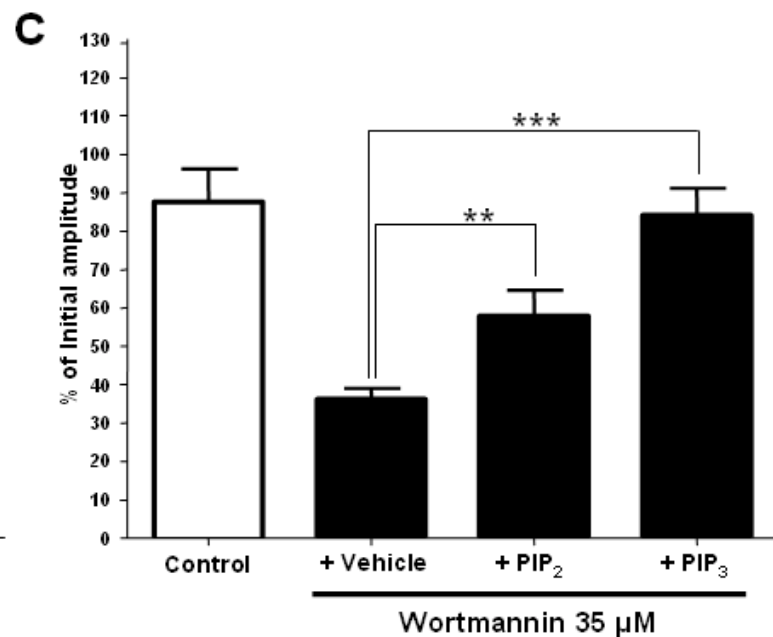

Supplement: MOESM3 [file 9612840]
